# Supplementary material for: Fibroblasts Colonizing Nerve Conduits Express High Levels of Soluble Neuregulin1, a Factor Promoting Schwann Cell Dedifferentiation
Source: PubMed Central journal article supplement (PMC7349576; doi:10.3390/cells9061366), 2020-06-01
Supplement: cells-09-01366-s001.pdf [file cells-09-01366-s001.pdf]

## Supplementary Information

### **Fibroblasts colonizing nerve conduits express high levels of soluble Neuregulin1, a factor promoting Schwann cell dedifferentiation**

Benedetta Elena Fornasari<sup>1,2</sup>, Marwa El Soury<sup>1,2</sup>, Giulia Nato<sup>2,3</sup>, Alessia Fucini<sup>1</sup>, Giacomo Carta<sup>1,2</sup>,  
Giulia Ronchi<sup>1,2</sup>, Alessandro Crosio<sup>1,2,4</sup>, Isabelle Perroteau<sup>1</sup>, Stefano Geuna<sup>1,2</sup>, Stefania Raimondo<sup>1,2</sup>,  
Giovanna Gambarotta<sup>1,2\*</sup>

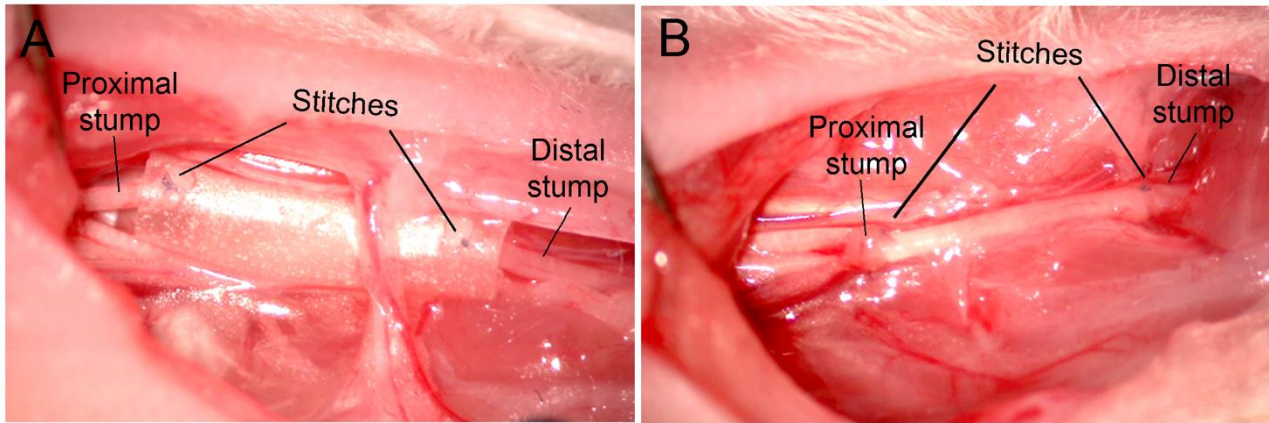

**Figure 1.** Macroscopic view of implantation sites. Rat median nerve 8 mm defect was repaired with a 10 mm long chitosan conduit (A) or with autograft technique (B).

**Table 1.** Antibodies used for western blot and immunohistochemistry analysis (Abcam, Cambridge, UK; Bio-Rad, Hercules, CA, USA; Cell Signaling Technology, Danvers, MA, USA; Covance, BioLegend, San Diego, CA, USA; Jackson ImmunoResearch, Philadelphia, PA, USA; R&D Systems, Minneapolis, MN, USA; Santa Cruz Biotechnology, Dallas, TX, USA; Sigma-Aldrich, Merck, Darmstadt, Germany).

| <i>Antibodies for Western blot analysis</i> |                |                 |             |                           |
|---------------------------------------------|----------------|-----------------|-------------|---------------------------|
| <b>Primary antibodies</b>                   |                |                 |             |                           |
|                                             | <b>Code</b>    | <b>Dilution</b> | <b>Host</b> | <b>Source</b>             |
| <b>AKT</b>                                  | 9272           | 1:1000          | Rabbit      | Cell Signaling Technology |
| <b>phospho-AKT (Ser473)</b>                 | 4051           | 1:1000          | Mouse       | Cell Signaling Technology |
| <b>phospho-cJun (Ser63)</b>                 | 2361           | 1:1000          | Rabbit      | Cell Signaling Technology |
| <b>HER1/ErbB1</b>                           | sc-03          | 1:1000          | Rabbit      | Santa Cruz Biotechnology  |
| <b>HER2/ErbB2</b>                           | sc-284         | 1:1000          | Rabbit      | Santa Cruz Biotechnology  |
| <b>HER3/ErbB3</b>                           | sc-285         | 1:1000          | Rabbit      | Santa Cruz Biotechnology  |
| <b>HER4/ErbB4</b>                           | sc-283         | 1:1000          | Rabbit      | Santa Cruz Biotechnology  |
| <b>ERK</b>                                  | 9102           | 1:1000          | Rabbit      | Cell Signaling Technology |
| <b>phospho-ERK (Thr202/Tyr204)</b>          | 9106           | 1:2000          | Mouse       | Cell Signaling Technology |
| <b>NRG1 C terminus</b>                      | sc-348         | 1:1000          | Rabbit      | Santa Cruz Biotechnology  |
| <b>MBP</b>                                  | SMI94<br>SMI99 | 1:4000          | Mouse       | Covance, BioLegend        |
| <b>actin</b>                                | A5316          | 1:4000          | Mouse       | Sigma-Aldrich, Merck      |
| <b>Secondary antibodies</b>                 |                |                 |             |                           |
|                                             | <b>Code</b>    | <b>Dilution</b> | <b>Host</b> | <b>Source</b>             |

|                                        |      |         |      |                           |
|----------------------------------------|------|---------|------|---------------------------|
| <b>HRP coniugated-<br/>anti-rabbit</b> | 7074 | 1:15000 | Goat | Cell Signaling Technology |
| <b>HRP coniugated-<br/>anti-mouse</b>  | 7076 | 1:15000 | Goat | Cell Signaling Technology |

| <i>Antibodies for Immunohistochemistry</i> |             |                 |             |                          |
|--------------------------------------------|-------------|-----------------|-------------|--------------------------|
| <i>Primary antibodies</i>                  |             |                 |             |                          |
|                                            | <b>Code</b> | <b>Dilution</b> | <b>Host</b> | <b>Source</b>            |
| <b>CD34</b>                                | AF4117      | 1:100           | Goat        | R&D Systems              |
| <b>S100<math>\beta</math></b>              | HPA015768   | 1:500           | Rabbit      | Sigma-Aldrich, Merck     |
| <b>NRG1 C terminus</b>                     | sc-348      | 1:200           | Rabbit      | Santa Cruz Biotechnology |
| <b>RECA1</b>                               | MCA970R     | 1:500           | Mouse       | Bio-Rad (AbD Serotec)    |
| <i>Secondary antibodies</i>                |             |                 |             |                          |
|                                            | <b>Code</b> | <b>Dilution</b> | <b>Host</b> | <b>Source</b>            |
| <b>AlexaFluor 488<br/>Anti-Goat</b>        | ab150129    | 1:400           | Donkey      | Abcam                    |
| <b>Cy3 Anti-Mouse</b>                      | 715-165-151 | 1:800           | Donkey      | Jackson ImmunoResearch   |
| <b>AlexaFluor 647<br/>Anti-Rabbit</b>      | 711-605-152 | 1:800           | Donkey      | Jackson ImmunoResearch   |
